# Supplementary material for: Tumor mutational burden predicts the efficacy of pembrolizumab monotherapy: a pan-tumor retrospective analysis of participants with advanced solid tumors
Source: PubMed Central journal article supplement — J Immunother Cancer. 2022 Jan 31;10(1):e003091. doi: 10.1136/jitc-2021-003091 (PMC8804694; doi:10.1136/jitc-2021-003091), 2022-01-31
Supplement: jitc-2021-003091supp001.pdf [file jitc-2021-003091supp001.pdf]

**Figure S1.** Reanalysis of the Samstein et al. data set using the published tumor-specific TMB cutpoints and a pan-tumor 10 mut/Mb cutpoint. Because there were only 2 patients with TMB  $\geq 10$  mut/Mb in the renal cell carcinoma cohort, the hazard ratio for the single 10-mut/Mb cutpoint was not evaluable for this cohort.

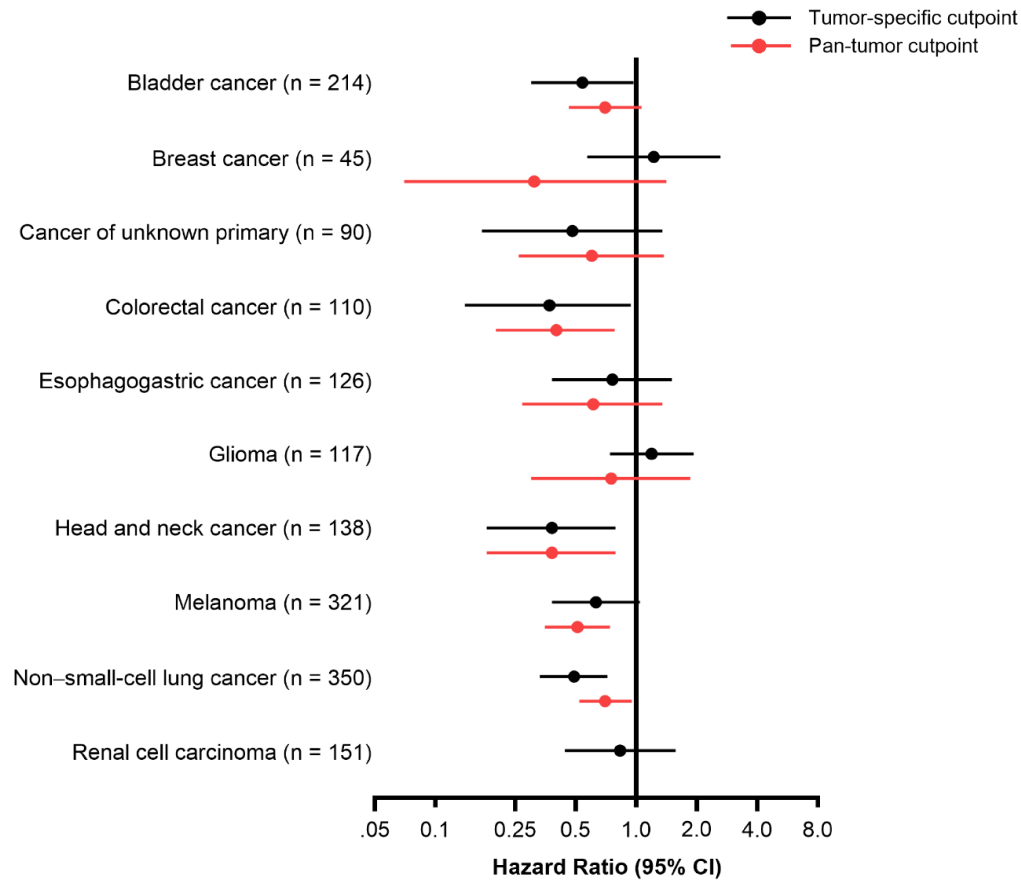

**Figure S2.** Participant Flow. <sup>a</sup>Enrollment in KEYNOTE-001 cohort F1 and KEYNOTE-086 cohort B was restricted to participants with previously untreated disease. <sup>b</sup>Enrollment in KEYNOTE-199 cohort 3 was restricted to participants with bone-predominant disease, which is not measurable per RECIST v1.1. <sup>c</sup>Participants from the chemotherapy arm of KEYNOTE-002 were excluded because there not enough participants with available TMB to support reliable between-arm treatment comparisons. <sup>d</sup>The exclusion of the participant from KEYNOTE-010 who was enrolled at a site with a GCP compliance issue was consistent with the primary analysis for the study. GCP, good clinical practice; TMB, tumor mutational burden; WES, whole exome sequencing.

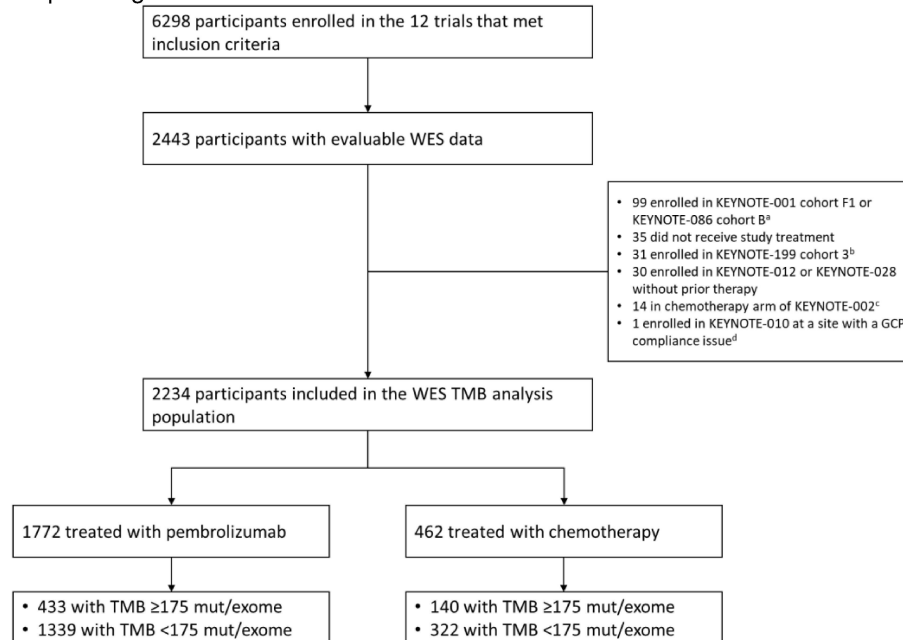

**Figure S3.** Best percentage change from baseline in target lesions in the pooled pembrolizumab population. **A.** Participants with WES TMB  $\geq 175$  mut/exome. **B.** Participants with WES TMB  $< 175$  mut/exome. Change from baseline was assessed per RECIST v1.1 by independent central review.

**A.**

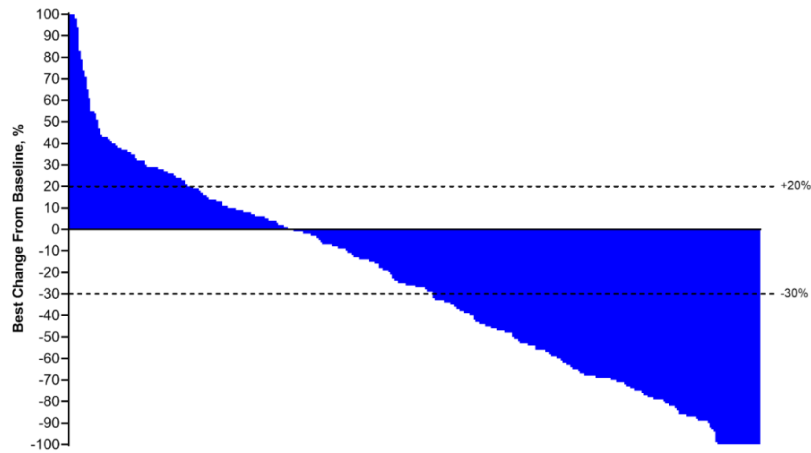

**B.**

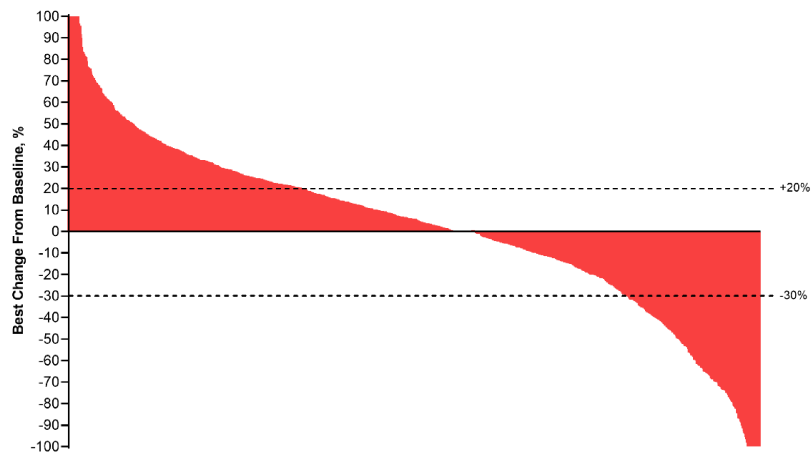

**Figure S4.** Relationship between continuous TMB and the probability of objective response in the pooled pembrolizumab population. The solid line represents the observed ORR above the cutoff. The dotted line represents the upper and lower bounds of the 95% Clopper-Pearson confidence interval. TMB was increased in increments of 25 mut/exome until a cutoff with <50 participants represented was reached. ORR, objective response rate; TMB, tumor mutational burden.

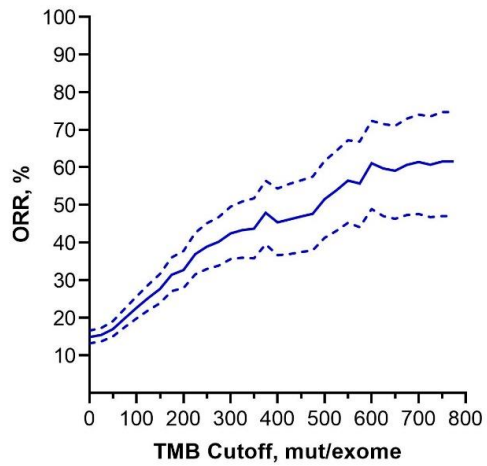

**Figure S5.** Kaplan-Meier estimates of OS for pembrolizumab versus chemotherapy in the 3 randomized clinical trials included in the analysis.

**A. KEYNOTE-010 (non-small-cell lung cancer), TMB  $\geq$ 175 mut/exome**

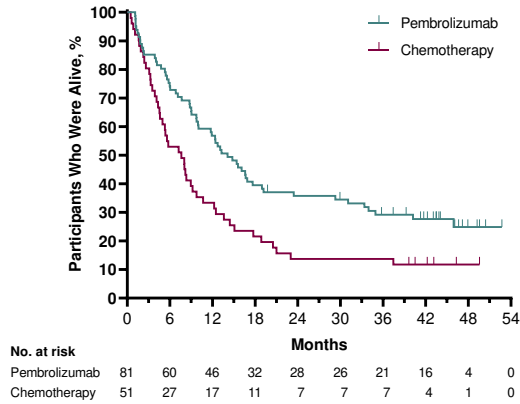

**B. KEYNOTE-010 (non-small-cell lung cancer), TMB <175 mut/exome**

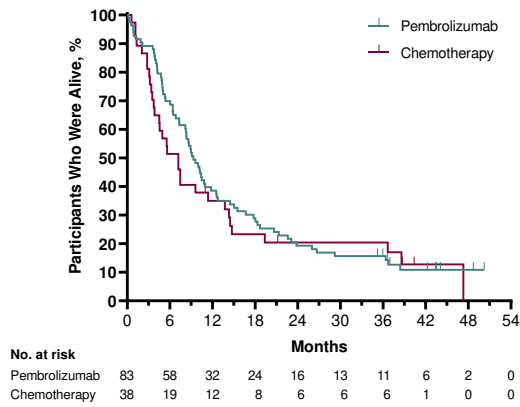

**C. KEYNOTE-045 (urothelial cancer), TMB  $\geq$ 175 mut/exome**

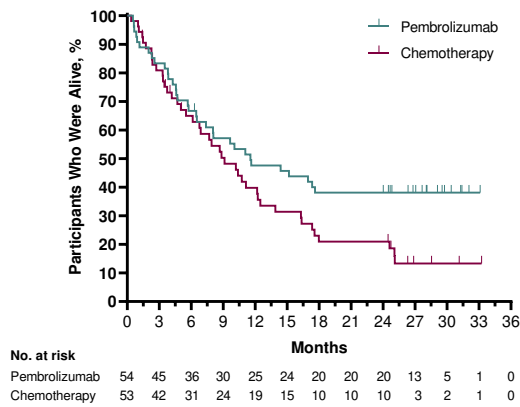

**D. KEYNOTE-045 (urothelial cancer), TMB <175 mut/exome**

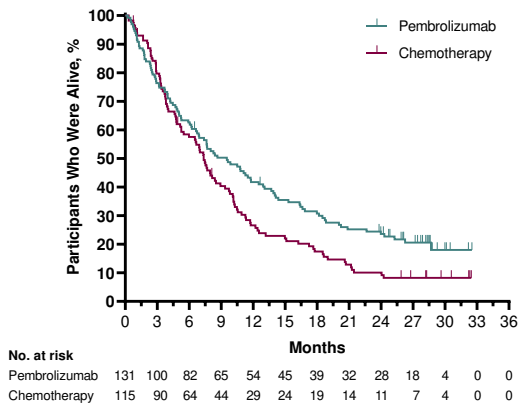

**E. KEYNOTE-061 (gastric cancer), TMB ≥175 mut/exome**

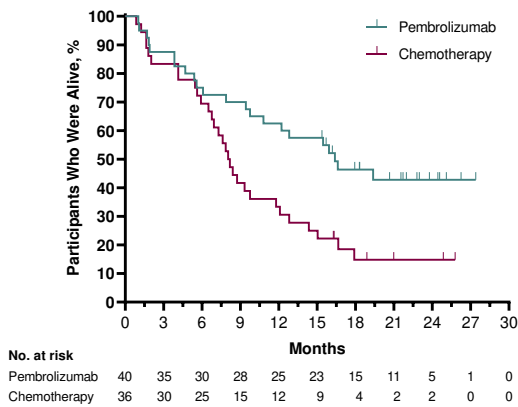

**F. KEYNOTE-061 (gastric cancer), TMB <175 mut/exome**

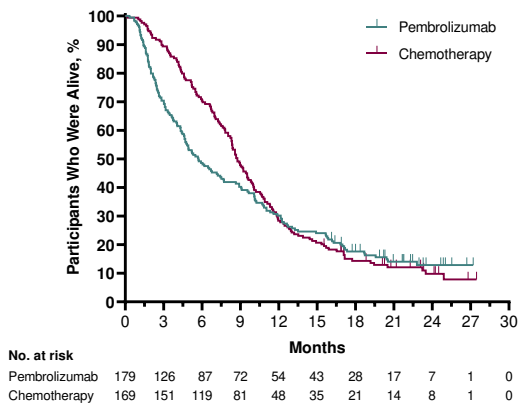

**Figure S6.** Kaplan-Meier estimates of PFS for pembrolizumab versus chemotherapy in the 3 randomized trials included in the analysis. PFS was assessed per RECIST v1.1 by independent central review.

**A. KEYNOTE-010 (non-small-cell lung cancer), TMB  $\geq$ 175 mut/exome**

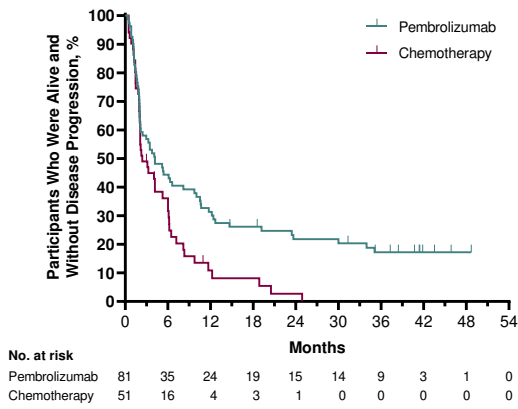

**B. KEYNOTE-010 (non-small-cell lung cancer), TMB <175 mut/exome**

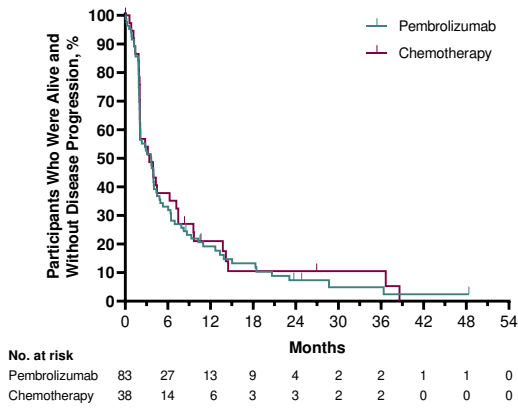

**C. KEYNOTE-045 (urothelial cancer), TMB  $\geq$ 175 mut/exome**

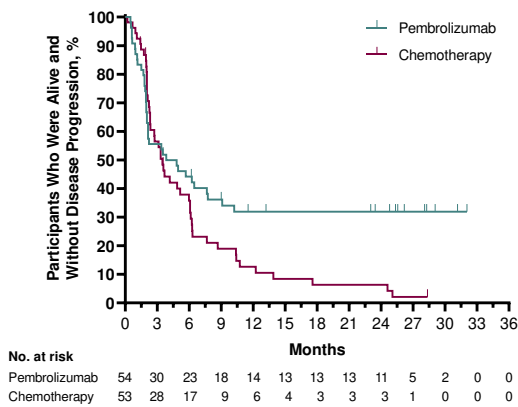

**D. KEYNOTE-045 (urothelial cancer), TMB <175 mut/exome**

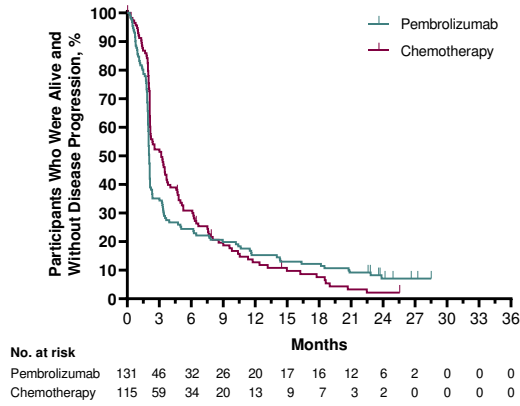

**E. KEYNOTE-061 (gastric cancer), TMB ≥175 mut/exome**

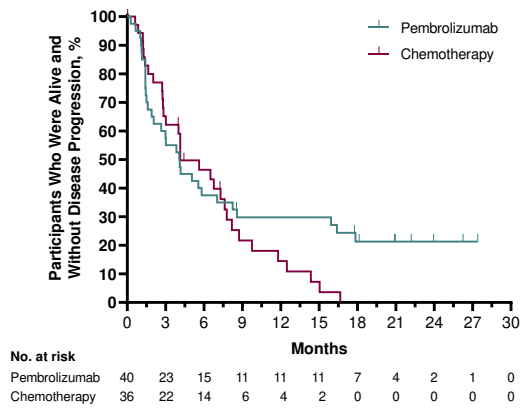

**F. KEYNOTE-061 (gastric cancer), TMB <175 mut/exome**

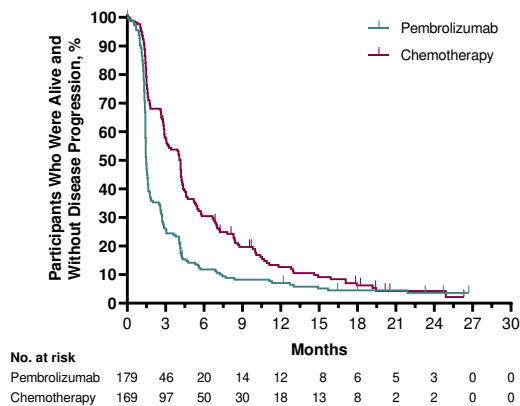



**Table S1.** Summary of clinical studies included in the dataset

| Name (NCT Number)         | Description                                                                          | Tumor Types                                                                                                                                                                                                                          | Dosing Regimen                                                                                                                                                                                                         | Efficacy Endpoints                                                                                           | Participants Enrolled                       |
|---------------------------|--------------------------------------------------------------------------------------|--------------------------------------------------------------------------------------------------------------------------------------------------------------------------------------------------------------------------------------|------------------------------------------------------------------------------------------------------------------------------------------------------------------------------------------------------------------------|--------------------------------------------------------------------------------------------------------------|---------------------------------------------|
| KEYNOTE-001 (NCT01295827) | Multicenter, multi-cohort, phase 1 study of pembrolizumab monotherapy                | <ul style="list-style-type: none"> <li>• Solid tumors (cohort A)</li> <li>• Melanoma, previously treated and treatment naive (cohorts B and D)</li> <li>• NSCLC, previously treated and treatment naive (cohorts C and F)</li> </ul> | <ul style="list-style-type: none"> <li>• Cohort A: 1 to 10 mg/kg Q2W</li> <li>• Cohorts B and F: 2 or 10 mg/kg Q3W or 10 mg/kg Q2W</li> <li>• Cohort C: 10 mg/kg Q3W</li> <li>• Cohort D: 2 or 10 mg/kg Q3W</li> </ul> | <ul style="list-style-type: none"> <li>• Primary: ORR</li> <li>• Secondary: DCR, DOR, PFS, and OS</li> </ul> | 1302                                        |
| KEYNOTE-002 (NCT01704287) | Multicenter, randomized, open-label, phase 2 study of pembrolizumab vs. chemotherapy | <ul style="list-style-type: none"> <li>• Melanoma, ipilimumab-refractory</li> </ul>                                                                                                                                                  | <ul style="list-style-type: none"> <li>• Arm 1: pembrolizumab 2 mg/kg Q3W</li> <li>• Arm 2: pembrolizumab 10 mg/kg Q3W</li> <li>• Arm 3: investigator's choice of chemotherapy<sup>a</sup></li> </ul>                  | <ul style="list-style-type: none"> <li>• Primary: PFS and OS</li> <li>• Secondary: ORR and DOR</li> </ul>    | 544 (pembrolizumab arms only <sup>a</sup> ) |
| KEYNOTE-010 (NCT01905657) | Multicenter, randomized, open-label study of pembrolizumab vs. docetaxel             | <ul style="list-style-type: none"> <li>• NSCLC, previously treated, PD-L1–positive</li> </ul>                                                                                                                                        | <ul style="list-style-type: none"> <li>• Arm 1: pembrolizumab 10 mg/kg Q3W for 24 months</li> <li>• Arm 2: pembrolizumab 2 mg/kg Q3W for 24 months</li> <li>• Arm 3: docetaxel 75 mg/m<sup>2</sup> Q3W</li> </ul>      | <ul style="list-style-type: none"> <li>• Primary: PFS and OS</li> <li>• Secondary: ORR and DOR</li> </ul>    | 1034                                        |
| KEYNOTE-012 (NCT01848834) | Multicenter, multi-cohort, phase 1b study of pembrolizumab monotherapy               | <ul style="list-style-type: none"> <li>• TNBC (cohort A)</li> <li>• Head and neck cancer (cohorts B and B2)</li> <li>• Urothelial cancer (cohort C)</li> <li>• Gastric cancer (cohort D)</li> </ul>                                  | <ul style="list-style-type: none"> <li>• Cohorts A, B, C, and D: 10 mg/kg Q2W for 24 months</li> <li>• Cohort B2: 200 mg Q3W for 24 months</li> </ul>                                                                  | <ul style="list-style-type: none"> <li>• Primary: ORR</li> <li>• Secondary: DOR, PFS, and OS</li> </ul>      | 297                                         |
| KEYNOTE-028 (NCT02054806) | Multicenter, multi-cohort, phase 1b study of pembrolizumab monotherapy               | <ul style="list-style-type: none"> <li>• Select advanced solid tumors<sup>b</sup></li> </ul>                                                                                                                                         | <ul style="list-style-type: none"> <li>• Pembrolizumab 10 mg/kg Q2W for 24 months</li> </ul>                                                                                                                           | <ul style="list-style-type: none"> <li>• Primary: ORR</li> <li>• Secondary: DOR, PFS, and OS</li> </ul>      | 477                                         |

| Name (NCT Number)         | Description                                                                                                  | Tumor Types                                                                                                                                                                                                                                          | Dosing Regimen                                                                                                                                                                                                                                | Efficacy Endpoints                                                                                              | Participants Enrolled |
|---------------------------|--------------------------------------------------------------------------------------------------------------|------------------------------------------------------------------------------------------------------------------------------------------------------------------------------------------------------------------------------------------------------|-----------------------------------------------------------------------------------------------------------------------------------------------------------------------------------------------------------------------------------------------|-----------------------------------------------------------------------------------------------------------------|-----------------------|
| KEYNOTE-045 (NCT02256436) | Multicenter, randomized, open-label, phase 3 study of pembrolizumab vs. chemotherapy                         | <ul style="list-style-type: none"> <li>• Urothelial cancer, previously treated</li> </ul>                                                                                                                                                            | <ul style="list-style-type: none"> <li>• Pembrolizumab 200 mg Q3W for 24 months</li> <li>• Investigator's choice of paclitaxel 175 mg/m<sup>2</sup> Q3W, docetaxel 75 mg/m<sup>2</sup> Q3W, or vinflunine 320 mg/m<sup>2</sup> Q3W</li> </ul> | <ul style="list-style-type: none"> <li>• PFS and OS</li> <li>• Secondary: ORR and DOR</li> </ul>                | 542                   |
| KEYNOTE-055 (NCT02255097) | Multicenter, single-cohort, phase 2 study of pembrolizumab monotherapy                                       | <ul style="list-style-type: none"> <li>• Head and neck cancer, platinum- and cetuximab-refractory</li> </ul>                                                                                                                                         | <ul style="list-style-type: none"> <li>• Pembrolizumab 200 mg Q3W for 24 months</li> </ul>                                                                                                                                                    | <ul style="list-style-type: none"> <li>• Primary: ORR</li> <li>• Secondary: DOR, PFS, and OS</li> </ul>         | 172                   |
| KEYNOTE-059 (NCT02335411) | Multicenter, multi-cohort, phase 2 study of pembrolizumab as monotherapy or in combination with chemotherapy | <ul style="list-style-type: none"> <li>• Gastric cancer, ≥2 lines of prior therapy (cohort 1)</li> <li>• Gastric cancer, no previous treatment (cohort 2)</li> <li>• Gastric cancer, PD-L1–positive with no previous treatment (cohort 3)</li> </ul> | <ul style="list-style-type: none"> <li>• Cohorts 1 and 3: pembrolizumab 200 mg Q3W for 24 months</li> <li>• Cohort 2: pembrolizumab 200 mg Q3W for 24 months plus cisplatin and 5-fluorouracil or capecitabine</li> </ul>                     | <ul style="list-style-type: none"> <li>• Primary: ORR</li> <li>• Secondary: DCR, DOR, PFS, and OS</li> </ul>    | 318                   |
| KEYNOTE-061 (NCT02370498) | Multicenter, randomized, open-label, phase 3 study of pembrolizumab vs. paclitaxel                           | <ul style="list-style-type: none"> <li>• Gastric cancer, previously treated</li> </ul>                                                                                                                                                               | <ul style="list-style-type: none"> <li>• Pembrolizumab 200 mg Q3W for 24 months</li> <li>• Paclitaxel 80 mg/m<sup>2</sup> on days 1, 8, and 15 of each 4-week cycle</li> </ul>                                                                | <ul style="list-style-type: none"> <li>• Primary: OS and PFS</li> <li>• Secondary: ORR, DOR, and TTP</li> </ul> | 592                   |
| KEYNOTE-086 (NCT02447003) | Multicenter, multi-cohort, phase 2 study of pembrolizumab monotherapy                                        | <ul style="list-style-type: none"> <li>• TNBC, ≥1 line of prior therapy (cohort A)</li> <li>• TNBC, no previous treatment (cohort B)</li> </ul>                                                                                                      | <ul style="list-style-type: none"> <li>• Pembrolizumab 200 mg Q3W for 24 months</li> </ul>                                                                                                                                                    | <ul style="list-style-type: none"> <li>• Primary: ORR</li> <li>• Secondary: DCR, DOR, PFS, and OS</li> </ul>    | 254                   |
| KEYNOTE-100 (NCT02674061) | Multicenter, multi-cohort, phase 2 study of pembrolizumab monotherapy                                        | <ul style="list-style-type: none"> <li>• Ovarian cancer, ≤2 lines of prior therapy (cohort A)</li> </ul>                                                                                                                                             | <ul style="list-style-type: none"> <li>• Pembrolizumab 200 mg Q3W for 24 months</li> </ul>                                                                                                                                                    | <ul style="list-style-type: none"> <li>• Primary: ORR</li> <li>• Secondary: DCR, DOR, PFS, and OS</li> </ul>    | 378                   |

| Name (NCT Number)         | Description                                                           | Tumor Types                                                                                                                                                                                                                                                                                                                                                                                                                                                   | Dosing Regimen                                                                                                                                                                            | Efficacy Endpoints                                                                                       | Participants Enrolled |
|---------------------------|-----------------------------------------------------------------------|---------------------------------------------------------------------------------------------------------------------------------------------------------------------------------------------------------------------------------------------------------------------------------------------------------------------------------------------------------------------------------------------------------------------------------------------------------------|-------------------------------------------------------------------------------------------------------------------------------------------------------------------------------------------|----------------------------------------------------------------------------------------------------------|-----------------------|
|                           |                                                                       | <ul style="list-style-type: none"> <li>• Ovarian cancer, 3-5 lines of prior therapy (cohort B)</li> </ul>                                                                                                                                                                                                                                                                                                                                                     |                                                                                                                                                                                           |                                                                                                          |                       |
| KEYNOTE-199 (NCT02787005) | Multicenter, multi-cohort, phase 2 study of pembrolizumab monotherapy | <ul style="list-style-type: none"> <li>• mCRPC, PD-L1–positive, previous docetaxel treatment (cohort 1)</li> <li>• mCRPC, PD-L1–negative, previous docetaxel treatment (cohort 2)</li> <li>• mCRPC, bone metastases, RECIST-nonmeasurable, previous docetaxel treatment (cohort 3)</li> <li>• mCRPC, RECIST-measurable, no prior chemotherapy (cohort 4)</li> <li>• mCRPC, bone metastases, RECIST nonmeasurable, no prior chemotherapy (cohort 5)</li> </ul> | <ul style="list-style-type: none"> <li>• Cohorts 1-3: pembrolizumab 200 mg Q3W for 24 months</li> <li>• Cohorts 4 and 5: pembrolizumab 200 mg Q3W for 24 months + enzalutamide</li> </ul> | <ul style="list-style-type: none"> <li>• Primary: ORR</li> <li>• Secondary: DCR, DOR, and PFS</li> </ul> | 388                   |

<sup>a</sup>There were only 14 participants in the chemotherapy arm who had available whole-exome sequencing data. Because this is not enough for reliable between-treatment comparisons, only the pembrolizumab-treated participants were included in the whole-exome sequencing analysis.

<sup>b</sup>Included tumor types were colon or rectal adenocarcinoma; anal squamous cell carcinoma; pancreatic adenocarcinoma; esophageal squamous cell carcinoma or adenocarcinoma, including of the gastroesophageal junction; cholangiocarcinoma; carcinoid tumor; well or moderately differentiated neuroendocrine carcinoma; estrogen receptor-positive, HER2-negative breast cancer; ovarian epithelial, fallopian tumor, or primary peritoneal carcinoma; endometrial carcinoma; cervical squamous cell carcinoma; vulvar squamous cell carcinoma; small-cell lung cancer; malignant plural mesothelioma; papillary or follicular thyroid cancer; salivary gland carcinoma; nasopharyngeal carcinoma; glioblastoma; leiomyosarcoma; and prostate adenocarcinoma.

DCR, disease control rate; DOR, duration of response; mCRPC, metastatic castration-resistant prostate cancer; NSCLC, non-small-cell lung cancer; ORR, objective response rate; OS, overall survival; PD-L1, programmed death ligand 1; PFS, progression-free survival; Q2W, every 2 weeks; Q3W, every 3 weeks; TNBC, triple-negative breast cancer; TTP, time to progression.

**Table S2.** Participants included in the WES analysis by tumor type and study

| <b>Tumor Type</b>                  | <b>Study</b> | <b>With WES Data</b> | <b>With TMB ≥175 mut/exome</b> | <b>With TMB &lt;175 mut/exome</b> |
|------------------------------------|--------------|----------------------|--------------------------------|-----------------------------------|
| Pembrolizumab-Treated Participants | Total        | 1772                 | 433                            | 1339                              |
| Gastric                            | Total        | 314                  | 53                             | 261                               |
|                                    | KEYNOTE-012  | 10                   | 2                              | 8                                 |
|                                    | KEYNOTE-059  | 85                   | 11                             | 74                                |
|                                    | KEYNOTE-061  | 219                  | 40                             | 179                               |
| Head and neck                      | Total        | 235                  | 59                             | 176                               |
|                                    | KEYNOTE-012  | 83                   | 22                             | 61                                |
|                                    | KEYNOTE-055  | 152                  | 37                             | 115                               |
| Melanoma                           | Total        | 76                   | 43                             | 33                                |
|                                    | KEYNOTE-001  | 30                   | 17                             | 13                                |
|                                    | KEYNOTE-002  | 46                   | 26                             | 20                                |
| Non-small-cell lung                | Total        | 323                  | 158                            | 165                               |
|                                    | KEYNOTE-001  | 159                  | 77                             | 82                                |
|                                    | KEYNOTE-010  | 164                  | 81                             | 83                                |
| Ovarian                            | KEYNOTE-100  | 293                  | 12                             | 281                               |
| Prostate                           | Total        | 126                  | 11                             | 115                               |
|                                    | KEYNOTE-028  | 3                    | 0                              | 3                                 |
|                                    | KEYNOTE-199  | 123                  | 11                             | 112                               |
| Triple-negative breast             | Total        | 137                  | 22                             | 115                               |
|                                    | KEYNOTE-012  | 10                   | 1                              | 9                                 |
|                                    | KEYNOTE-086  | 127                  | 21                             | 106                               |
| Urothelial                         | Total        | 198                  | 61                             | 137                               |
|                                    | KEYNOTE-012  | 13                   | 7                              | 6                                 |
|                                    | KEYNOTE-045  | 185                  | 54                             | 131                               |
| Other tumors                       | Total        | 70                   | 14                             | 56                                |
| Anal                               | KEYNOTE-028  | 7                    | 5                              | 2                                 |
| Carcinoid                          | KEYNOTE-028  | 6                    | 1                              | 5                                 |
| Cervical                           | KEYNOTE-028  | 3                    | 0                              | 3                                 |
| Cholangiocarcinoma                 | KEYNOTE-028  | 6                    | 1                              | 5                                 |
| Colorectal                         | KEYNOTE-028  | 5                    | 0                              | 5                                 |
| Endometrial                        | KEYNOTE-028  | 4                    | 1                              | 3                                 |
| ER+/HER2- breast                   | KEYNOTE-028  | 2                    | 0                              | 2                                 |
| Esophageal                         | KEYNOTE-028  | 3                    | 0                              | 3                                 |
| Leiomyosarcoma                     | KEYNOTE-028  | 2                    | 0                              | 2                                 |
| Mesothelioma                       | KEYNOTE-028  | 8                    | 3                              | 5                                 |
| Neuroendocrine                     | KEYNOTE-028  | 1                    | 0                              | 1                                 |
| Pancreatic                         | KEYNOTE-028  | 2                    | 0                              | 2                                 |
| Salivary                           | KEYNOTE-028  | 8                    | 1                              | 7                                 |
| Small-cell lung                    | KEYNOTE-028  | 4                    | 2                              | 2                                 |
| Thyroid                            | KEYNOTE-028  | 7                    | 0                              | 7                                 |
| Vulvar                             | KEYNOTE-028  | 2                    | 0                              | 2                                 |
| Chemotherapy-Treated Participants  | Total        | 462                  | 140                            | 322                               |
| Gastric                            | KEYNOTE-061  | 205                  | 36                             | 169                               |

| <b>Tumor Type</b>   | <b>Study</b> | <b>With WES Data</b> | <b>With TMB ≥175 mut/exome</b> | <b>With TMB &lt;175 mut/exome</b> |
|---------------------|--------------|----------------------|--------------------------------|-----------------------------------|
| Non-small-cell lung | KEYNOTE-010  | 89                   | 51                             | 38                                |
| Urothelial          | KEYNOTE-045  | 168                  | 53                             | 115                               |

**Table S3.** Baseline demographics and disease characteristics among participants in the pooled pembrolizumab population by WES TMB score

|                                                                     | <b>TMB ≥175 mut/exome<br/>(N = 433)</b> | <b>TMB &lt;175 mut/exome<br/>(N = 1339)</b> |
|---------------------------------------------------------------------|-----------------------------------------|---------------------------------------------|
| <b>Sex, n (%)</b>                                                   |                                         |                                             |
| Male                                                                | 279 (64.4)                              | 671 (50.1)                                  |
| Female                                                              | 154 (35.6)                              | 668 (49.9)                                  |
| <b>Age</b>                                                          |                                         |                                             |
| Median (range), years                                               | 63 (20-89)                              | 62 (23-90)                                  |
| ≥65 years, n (%)                                                    | 199 (46.0)                              | 559 (41.7)                                  |
| <b>ECOG performance status, n (%)</b>                               |                                         |                                             |
| 0                                                                   | 174 (40.2)                              | 608 (45.4)                                  |
| 1                                                                   | 253 (58.4)                              | 716 (53.5)                                  |
| 2                                                                   | 5 (1.2)                                 | 12 (0.9)                                    |
| Unknown                                                             | 1 (0.2)                                 | 3 (0.2)                                     |
| <b>Metastatic stage, n (%)</b>                                      |                                         |                                             |
| M0                                                                  | 19 (4.4)                                | 50 (3.7)                                    |
| M1                                                                  | 401 (92.6)                              | 1006 (75.1)                                 |
| MX                                                                  | 1 (0.2)                                 | 1 (0.1)                                     |
| Not reported                                                        | 0                                       | 1 (0.1)                                     |
| Study did not collect                                               | 12 (2.8)                                | 281 (21.0)                                  |
| <b>Brain metastases, n (%)</b>                                      |                                         |                                             |
| Present                                                             | 36 (8.3)                                | 31 (2.3)                                    |
| Absent                                                              | 397 (91.7)                              | 1308 (97.7)                                 |
| <b>Number of prior lines of therapy for advanced disease, n (%)</b> |                                         |                                             |
| 0                                                                   | 5 (1.2)                                 | 10 (0.7)                                    |
| 1                                                                   | 203 (46.9)                              | 533 (39.8)                                  |
| 2                                                                   | 113 (26.1)                              | 358 (26.7)                                  |
| 3                                                                   | 59 (13.6)                               | 246 (18.4)                                  |
| 4                                                                   | 33 (7.6)                                | 94 (7.0)                                    |
| ≥5                                                                  | 20 (4.6)                                | 98 (7.3)                                    |
| <b>Tumor type, n (%)</b>                                            |                                         |                                             |
| Gastric                                                             | 53 (12.2)                               | 261 (19.5)                                  |
| Head and neck                                                       | 59 (13.6)                               | 176 (13.1)                                  |
| Melanoma                                                            | 43 (9.9)                                | 33 (2.5)                                    |
| Non-small-cell lung                                                 | 158 (36.5)                              | 165 (12.3)                                  |
| Ovarian                                                             | 12 (2.8)                                | 281 (21.0)                                  |
| Prostate                                                            | 11 (2.5)                                | 115 (8.6)                                   |
| Triple-negative breast                                              | 22 (5.1)                                | 115 (8.6)                                   |
| Urothelial                                                          | 61 (14.1)                               | 137 (10.2)                                  |
| Other                                                               | 14 (3.2)                                | 56 (4.2)                                    |
| Anal                                                                | 5 (1.2)                                 | 2 (0.1)                                     |
| Carcinoid                                                           | 1 (0.2)                                 | 5 (0.4)                                     |
| Cervical                                                            | 0                                       | 3 (0.2)                                     |
| Cholangiocarcinoma                                                  | 1 (0.2)                                 | 5 (0.4)                                     |
| Colorectal                                                          | 0                                       | 5 (0.4)                                     |
| Estrogen receptor-positive, HER2 negative breast                    | 0                                       | 2 (0.1)                                     |

|                                             |            |            |
|---------------------------------------------|------------|------------|
| Endometrial                                 | 1 (0.2)    | 3 (0.2)    |
| Esophageal                                  | 0          | 3 (0.2)    |
| Leiomyosarcoma                              | 0          | 2 (0.1)    |
| Mesothelioma                                | 3 (0.7)    | 5 (0.4)    |
| Neuroendocrine                              | 0          | 1 (0.1)    |
| Pancreatic                                  | 0          | 2 (0.1)    |
| Salivary                                    | 1 (0.2)    | 7 (0.5)    |
| Small-cell lung cancer                      | 2 (0.5)    | 2 (0.1)    |
| Thyroid                                     | 0          | 7 (0.5)    |
| Vulvar                                      | 0          | 2 (0.1)    |
| PD-L1 status by immunohistochemistry, n (%) |            |            |
| Positive                                    | 350 (80.8) | 850 (63.5) |
| Negative                                    | 72 (16.6)  | 376 (28.1) |
| Unknown                                     | 11 (2.5)   | 113 (8.4)  |
| MSI phenotype, n (%)                        |            |            |
| High                                        | 21 (4.8)   | 0          |
| Not high                                    | 412 (95.2) | 1339 (100) |

ECOG, Eastern Cooperative Oncology Group.

**Table S4.** Disposition of study medication at the time of database cutoff among participants in the pooled pembrolizumab population by WES TMB score

|                           | <b>TMB <math>\geq</math>175 mut/exome<br/>(N = 433)</b> | <b>TMB &lt;175 mut/exome<br/>(N = 1339)</b> |
|---------------------------|---------------------------------------------------------|---------------------------------------------|
| Ongoing                   | 37 (8.5)                                                | 55 (4.1)                                    |
| Completed                 | 32 (7.4)                                                | 21 (1.6)                                    |
| Discontinued              | 364 (84.1)                                              | 1263 (94.3)                                 |
| Adverse event             | 57 (13.2)                                               | 126 (9.4)                                   |
| Clinical progression      | 11 (2.5)                                                | 106 (7.9)                                   |
| Complete response         | 6 (1.4)                                                 | 6 (0.4)                                     |
| Death                     | 5 (1.2)                                                 | 12 (0.9)                                    |
| Excluded medication       | 0                                                       | 1 (0.1)                                     |
| Lost to follow-up         | 0                                                       | 1 (0.1)                                     |
| Other                     | 4 (0.9)                                                 | 5 (0.4)                                     |
| Physician decision        | 38 (8.8)                                                | 98 (7.3)                                    |
| Progressive disease       | 218 (50.3)                                              | 854 (63.8)                                  |
| Protocol violation        | 4 (0.9)                                                 | 6 (0.4)                                     |
| Withdrawal by participant | 21 (4.8)                                                | 48 (3.6)                                    |

Database cutoff dates were as follows: 05 Nov 2018 for KEYNOTE-001, 16 Nov 2015 for KEYNOTE-002, 16 Mar 2018 for KEYNOTE-010, 26 Apr 2016 for KEYNOTE-012, 23 Jan 2019 for KEYNOTE-028, 26 Oct 2017 for KEYNOTE-045, 22 Apr 2016 for KEYNOTE-055, 08 Aug 2018 for KEYNOTE-059, 26 Oct 2017 for KEYNOTE-061, 10 Nov 2017 for KEYNOTE-086, 02 Feb 2018 for KEYNOTE-100, and 24 Jun 2019 for KEYNOTE-199.



**Table S5.** Response assessed per RECIST v1.1 by independent central review in participants in the pooled pembrolizumab population by WES TMB Score

|                              | <b>TMB ≥175 mut/exome<br/>(N = 433)</b> | <b>TMB &lt;175 mut/exome<br/>(N = 1339)</b> |
|------------------------------|-----------------------------------------|---------------------------------------------|
| ORR, % (95% CI)              | 31.4 (27.1-36.0)                        | 9.5 (8.0-11.2)                              |
| Best overall response, n (%) |                                         |                                             |
| Complete response            | 31 (7.2)                                | 28 (2.1)                                    |
| Partial response             | 105 (24.2)                              | 99 (7.4)                                    |
| Stable disease               | 110 (25.4)                              | 307 (22.9)                                  |
| Non-CR/non-PD <sup>a</sup>   | 3 (0.7)                                 | 13 (1.0)                                    |
| Progressive disease          | 141 (32.6)                              | 747 (55.8)                                  |
| Not evaluable <sup>b</sup>   | 7 (1.6)                                 | 35 (2.6)                                    |
| Not assessed <sup>c</sup>    | 36 (8.3)                                | 110 (8.2)                                   |

<sup>a</sup>Participants with disease not measurable per RECIST v1.1 by central review at baseline who did not have complete disappearance of all lesions or development of new lesions.

<sup>b</sup>Participants who had ≥1 postbaseline imaging assessment, none of which were evaluable for response.

<sup>c</sup>Participants who did not undergo postbaseline imaging.

CR, complete response; PD, progressive disease.

**Table S6.** Association of WES TMB ( $\log_{10}$ -transformed) with efficacy by treatment arm in the randomized, controlled studies included in the analysis

| Study       | Nominal Two-Sided p value |        |        |              |       |       |
|-------------|---------------------------|--------|--------|--------------|-------|-------|
|             | Pembrolizumab             |        |        | Chemotherapy |       |       |
|             | ORR                       | PFS    | OS     | ORR          | PFS   | OS    |
| KEYNOTE-010 | 0.016                     | 0.002  | 0.017  | 0.340        | 0.643 | 0.419 |
| KEYNOTE-045 | 0.013                     | 0.005  | 0.029  | 0.609        | 0.754 | 0.174 |
| KEYNOTE-061 | 0.001                     | <0.001 | <0.001 | 0.558        | 0.668 | 0.819 |

ORR, objective response rate; OS, overall survival; PFS, progression-free survival.
